# Supplementary material for: Pädagogisches Wissen von berufstätigen Mathematiklehrkräften
Source: Atypon-hosted journal article supplement (doi:10.1026/0012-1924/a000250), 2020-04-01
Supplement: 0012-1924_a000250_esm1.pdf [file 0012-1924_a000250_esm1.pdf]

*Elektronisches Supplement 1.* Design-Matrix zum Test des pädagogischen Wissens aus der Studie TEDS-M (Teacher Education and Development Study: Learning to Teach Mathematics; König & Blömeke, 2009), mit Angaben zur Anzahl von (Teil-)Antwortitems je Subdimension in der Test-Kurzversion

| Berufliche Anforderungen von Lehrpersonen beim Unterrichten |                                           | Kognitive Anforderung |                         |          |
|-------------------------------------------------------------|-------------------------------------------|-----------------------|-------------------------|----------|
| Subdimensionen                                              | operationalisierte Themen                 | Erinnern              | Verstehen / Analysieren | Kreieren |
| Strukturierung von Unterricht                               | Komponenten- und prozessbezogene Planung  |                       |                         |          |
|                                                             | Analyse von Unterricht                    | 4                     | 10                      | 4        |
| Motivierung                                                 | Curriculare Strukturierung von Unterricht |                       |                         |          |
|                                                             | Leistungsmotivation                       | -                     | 6                       | 3        |
| Umgang mit Heterogenität                                    | Motivierungsstrategien im Unterricht      |                       |                         |          |
|                                                             | Differenzierungsmaßnahmen                 | 4                     | 8                       | -        |
| Klassenführung                                              | Methodenvielfalt                          |                       |                         |          |
|                                                             | Störungspräventive Unterrichtsführung     | -                     | -                       | 3        |
| Leistungsbeurteilung                                        | effektive Nutzung der Unterrichtszeit     |                       |                         |          |
|                                                             | Funktionen und Formen                     | 5                     | -                       | -        |
|                                                             | zentrale Kriterien                        |                       |                         |          |
|                                                             | Urteilsfehler                             |                       |                         |          |
