# Supplementary material for: Pädagogisches Wissen von berufstätigen Mathematiklehrkräften
Source: Atypon-hosted journal article supplement (doi:10.1026/0012-1924/a000250), 2020-04-01
Supplement: 0012-1924_a000250_esm2.pdf [file 0012-1924_a000250_esm2.pdf]

*Elektronisches Supplement 2.* Offene Aufgabe mit beispielhaften Antworten zur Erfassung des pädagogischen Wissens zu den Anforderungen „Strukturierung von Unterricht“ und „Erinnern“ (a) bzw. „Verstehen / Analysieren“ (b) (Blömeke, Kaiser & Lehmann, 2010)

Phasenmodelle von Unterricht stellen ein Grundgerüst dar, nach dem Unterricht strukturiert werden kann.

a) Nennen Sie die zentralen Phasen eines üblichen Unterrichtsverlaufs.

b) Nennen Sie die Funktion der jeweiligen Phase.

a) Name der Phase:

b) Funktion der Phase:

|                    |                                                                                           |
|--------------------|-------------------------------------------------------------------------------------------|
| Einstieg           | Motivation<br>Themenpräsentation                                                          |
| Problemstellung    | SuS verdeutlichen sich das Problem, sodass jeder es versteht                              |
| Erarbeitungsphase  | SuS gehen dem Problem „auf die Spur“. Hier kann ganz differenziert gearbeitet werden.     |
| Sicherungsphase    | Die Lösung wird präsentiert. Jeder kann die Lösung übernehmen – mögliche Diskussion nötig |
| Anwendung/Transfer | Die Lösung wird bei weiteren Aufgaben benötigt, Relevanz der Lösung transparent           |
