# Supplementary material for: Pädagogisches Wissen von berufstätigen Mathematiklehrkräften
Source: Atypon-hosted journal article supplement (doi:10.1026/0012-1924/a000250), 2020-04-01
Supplement: 0012-1924_a000250_esm3.pdf [file 0012-1924_a000250_esm3.pdf]

*Elektronisches Supplement 3.* Beispielimitem des Classroom Management Expertise-Tests zur Erfassung der Dimensionen „Genauigkeit der Wahrnehmung“ (a), „holistische Wahrnehmung“ (b) und „Interpretieren“ (c) (König, 2016)

|                                                                                                                                                                                                                                                                                                                                                                                                                                                                                                                                                                                                                                                                                                                                                                                                                                                                          |                                                                           |                                                                        |                          |    |                                            |                          |    |                                             |                          |    |                                                                           |                          |
|--------------------------------------------------------------------------------------------------------------------------------------------------------------------------------------------------------------------------------------------------------------------------------------------------------------------------------------------------------------------------------------------------------------------------------------------------------------------------------------------------------------------------------------------------------------------------------------------------------------------------------------------------------------------------------------------------------------------------------------------------------------------------------------------------------------------------------------------------------------------------|---------------------------------------------------------------------------|------------------------------------------------------------------------|--------------------------|----|--------------------------------------------|--------------------------|----|---------------------------------------------|--------------------------|----|---------------------------------------------------------------------------|--------------------------|
| <p>a) Nennen Sie vier verschiedene Handlungsmaßnahmen (Stichworte), mit denen die Lehrerin gezielt die Aufmerksamkeit der Schüler auf sich richtet.</p> <p>b) Wann findet die gesehene Situation zeitlich betrachtet ungefähr statt?<br/><i>Kreuzen Sie bitte nur <u>ein</u> Kästchen an.</i></p> <table><tr><td>A.</td><td>Am Anfang einer Unterrichtsstunde (d.h. während der ersten 5 Minuten).</td><td><input type="checkbox"/></td></tr><tr><td>B.</td><td>Im ersten Drittel einer Unterrichtsstunde.</td><td><input type="checkbox"/></td></tr><tr><td>C.</td><td>Im letzten Drittel einer Unterrichtsstunde.</td><td><input type="checkbox"/></td></tr><tr><td>D.</td><td>Am Ende einer Unterrichtsstunde (d.h. während der letzten ca. 5 Minuten).</td><td><input type="checkbox"/></td></tr></table> <p>c) Welche Funktion besitzt das Poster an der Tafel?</p> | A.                                                                        | Am Anfang einer Unterrichtsstunde (d.h. während der ersten 5 Minuten). | <input type="checkbox"/> | B. | Im ersten Drittel einer Unterrichtsstunde. | <input type="checkbox"/> | C. | Im letzten Drittel einer Unterrichtsstunde. | <input type="checkbox"/> | D. | Am Ende einer Unterrichtsstunde (d.h. während der letzten ca. 5 Minuten). | <input type="checkbox"/> |
| A.                                                                                                                                                                                                                                                                                                                                                                                                                                                                                                                                                                                                                                                                                                                                                                                                                                                                       | Am Anfang einer Unterrichtsstunde (d.h. während der ersten 5 Minuten).    | <input type="checkbox"/>                                               |                          |    |                                            |                          |    |                                             |                          |    |                                                                           |                          |
| B.                                                                                                                                                                                                                                                                                                                                                                                                                                                                                                                                                                                                                                                                                                                                                                                                                                                                       | Im ersten Drittel einer Unterrichtsstunde.                                | <input type="checkbox"/>                                               |                          |    |                                            |                          |    |                                             |                          |    |                                                                           |                          |
| C.                                                                                                                                                                                                                                                                                                                                                                                                                                                                                                                                                                                                                                                                                                                                                                                                                                                                       | Im letzten Drittel einer Unterrichtsstunde.                               | <input type="checkbox"/>                                               |                          |    |                                            |                          |    |                                             |                          |    |                                                                           |                          |
| D.                                                                                                                                                                                                                                                                                                                                                                                                                                                                                                                                                                                                                                                                                                                                                                                                                                                                       | Am Ende einer Unterrichtsstunde (d.h. während der letzten ca. 5 Minuten). | <input type="checkbox"/>                                               |                          |    |                                            |                          |    |                                             |                          |    |                                                                           |                          |
