# Supplementary material for: Pädagogisches Wissen von berufstätigen Mathematiklehrkräften
Source: Atypon-hosted journal article supplement (doi:10.1026/0012-1924/a000250), 2020-04-01
Supplement: 0012-1924_a000250_esm4.pdf [file 0012-1924_a000250_esm4.pdf]

*Elektronisches Supplement 4.* Beispielitem aus dem Videoinstrument der Studie Teacher Education and Development Study – Follow Up, mit der Anforderung des Entscheidens (Blömeke et al., 2014; König, 2016)

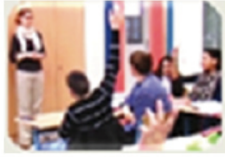

Die Lehrerin beendet die Partnerarbeit mit den Worten "Gut. Was habt ihr denn herausbekommen?"

Offenbar strebt sie damit einen Austausch der Ergebnisse an und wählt dazu ein von ihr selbst geleitetes Plenumsgespräch.

Skizzieren Sie stichwortartig zwei methodische Alternativen, um in dieser Unterrichtssituation das Ziel des Austausches weniger lehrkraftzentriert zu erreichen.
