# Supplementary material for: Pädagogisches Wissen von berufstätigen Mathematiklehrkräften
Source: Atypon-hosted journal article supplement (doi:10.1026/0012-1924/a000250), 2020-04-01
Supplement: 0012-1924_a000250_esm5.pdf [file 0012-1924_a000250_esm5.pdf]

*Elektronisches Supplement 5. Kodierungsverlauf bei offenen Items am Beispiel von Aufgabe PK39 (König & Blömeke, 2010)*

|           | Kodierungskategorie                                                     | Wertungskategorie für (Teil-)Antwortitems | Partial-Credit Antwortitem (Score) | Virtuelle (Antwortitem-)Fälle                                                        | Komplexitätsniveau                  |
|-----------|-------------------------------------------------------------------------|-------------------------------------------|------------------------------------|--------------------------------------------------------------------------------------|-------------------------------------|
| Codes     | 0, 1                                                                    | 0, 1                                      | 0, 1, 2, 3, 4                      | 0, 1                                                                                 | niedrig, mittel, hoch               |
| Variablen | PK39K1 (Voraussetzungen bei der Lerngruppe, insbesondere Vorwissen)     | PK39S01 (Kontext)                         | PK39S (Unterrichtsanalyse)         | PK39_1 (PK39S > 0)<br>PK39_2 (PK39S > 1)<br>PK39_3 (PK39S > 2)<br>PK39_4 (PK39S > 3) | niedrig<br>mittel<br>mittel<br>hoch |
|           | PK39K2 (Struktur)                                                       | PK39S02 (Input)                           |                                    |                                                                                      |                                     |
|           | PK39K5 (Aufgaben)                                                       |                                           |                                    |                                                                                      |                                     |
|           | PK39K6 (Thema, Inhalt)                                                  |                                           |                                    |                                                                                      |                                     |
|           | PK39K7 (Medien, Material)                                               |                                           |                                    |                                                                                      |                                     |
|           | PK39K8 (methodische Entscheidungen)                                     |                                           |                                    |                                                                                      |                                     |
|           | PK39K3 (Passung von Zeit und Planung)                                   | PK39S03 (Prozess)                         |                                    |                                                                                      |                                     |
|           | PK39K4 (Klarheit)                                                       |                                           |                                    |                                                                                      |                                     |
|           | PK39K9 (methodisch-didaktische Prinzipien)                              |                                           |                                    |                                                                                      |                                     |
|           | PK39K10 (Aktivierung, Motivierung)                                      |                                           |                                    |                                                                                      |                                     |
|           | PK39K11 (Lehrerrolle, Lehrer-Schüler-Interaktion)                       |                                           |                                    |                                                                                      |                                     |
|           | PK39K12 (Ergebnis – Passung von intendiertem und erreichtem Curriculum) | PK39S04 (Output)                          |                                    |                                                                                      |                                     |
