# Supplementary material for: Pädagogisches Wissen von berufstätigen Mathematiklehrkräften
Source: Atypon-hosted journal article supplement (doi:10.1026/0012-1924/a000250), 2020-04-01
Supplement: 0012-1924_a000250_esm6.pdf [file 0012-1924_a000250_esm6.pdf]

*Elektronisches Supplement 6.* Itemschwierigkeitsparameter der eindimensionalen Skalierung sowie Angaben zum Weighted Item Fit (Mean Square, Konfidenzintervall, T-Wert, Trennschärfe, erforderliche Wissens-elemente)

| Item                | Sub-dimensionen | Itemschwierigkeitsparameter | SE   | MNSQ | Konfidenzintervall | T-Wert | Trennschärfe | Anzahl erforderter Wissens-elemente |
|---------------------|-----------------|-----------------------------|------|------|--------------------|--------|--------------|-------------------------------------|
| PK01S01             | V / M           | -2.07                       | 0.23 | 0.99 | [0.10, 1.90]       | 0.1    | .30          | 1                                   |
| PK01S02             | V / M           | -1.45                       | 0.22 | 0.97 | [0.36, 1.64]       | 0.0    | .39          | 1                                   |
| PK01S03             | V / M           | -2.80                       | 0.24 | 0.95 | [0.00, 2.34]       | 0.1    | .48          | 1                                   |
| PK01S04             | V / M           | -0.63                       | 0.20 | 1.02 | [0.61, 1.39]       | 0.2    | .28          | 1                                   |
| PK01S05             | V / M           | 1.40                        | 0.17 | 1.03 | [0.88, 1.12]       | 0.5    | .31          | 1                                   |
| PK07S <sup>+</sup>  | E / L           | 1.36                        | 0.09 | 1.13 | [0.78, 1.22]       | 1.1    | .55          | 3                                   |
| PK09S               | V / M           | 2.94                        | 0.19 | 0.92 | [0.66, 1.34]       | -0.4   | .35          | 1                                   |
| PK12                | E / L           | 0.41                        | 0.18 | 0.98 | [0.79, 1.21]       | -0.1   | .37          | 1                                   |
| PK15S <sup>+</sup>  | E / L           | 1.66                        | 0.15 | 1.03 | [0.71, 1.29]       | 0.3    | .38          | 3                                   |
| PK20B               | V / U           | 0.18                        | 0.19 | 1.02 | [0.75, 1.25]       | 0.2    | .28          | 1                                   |
| PK20CS01            | V / U           | -1.25                       | 0.22 | 1.01 | [0.39, 1.61]       | 0.1    | .18          | 1                                   |
| PK20CS02            | V / U           | -2.61                       | 0.24 | 1.00 | [0.00, 2.31]       | 0.2    | .10          | 1                                   |
| PK20CS03            | V / U           | -0.60                       | 0.20 | 1.00 | [0.59, 1.41]       | 0.1    | .24          | 1                                   |
| PK20CS04            | V / U           | -1.10                       | 0.21 | 1.01 | [0.44, 1.56]       | 0.1    | .22          | 1                                   |
| PK22AS <sup>+</sup> | E / U           | -0.15                       | 0.13 | 0.77 | [0.42, 1.58]       | -0.8   | .61          | 4                                   |
| PK26S01             | V / U           | -0.02                       | 0.18 | 0.91 | [0.74, 1.26]       | -0.7   | .49          | 1                                   |
| PK26S02             | V / U           | -0.08                       | 0.18 | 0.88 | [0.73, 1.27]       | -0.8   | .51          | 1                                   |
| PK26S03             | V / U           | 0.27                        | 0.17 | 0.91 | [0.79, 1.21]       | -0.8   | .47          | 1                                   |
| PK32S1 <sup>+</sup> | V / S           | 1.64                        | 0.13 | 0.86 | [0.71, 1.29]       | -0.9   | .60          | 3                                   |
| PK32S2 <sup>+</sup> | V / S           | 1.39                        | 0.12 | 1.09 | [0.73, 1.27]       | 0.7    | .50          | 3                                   |
| PK32S3 <sup>+</sup> | V / S           | 0.87                        | 0.12 | 0.99 | [0.71, 1.29]       | -0.0   | .54          | 3                                   |
| PK32S4 <sup>+</sup> | V / S           | 0.89                        | 0.13 | 0.98 | [0.70, 1.30]       | -0.1   | .52          | 3                                   |
| PK33S <sup>+#</sup> | E / S           | 0.19                        | 0.12 | 1.06 | [0.59, 1.41]       | 0.4    | .46          | 4                                   |
| PK39S <sup>+#</sup> | K / S           | 0.30                        | 0.13 | 1.11 | [0.60, 1.40]       | 0.6    | .41          | 4                                   |
| PK40AS <sup>+</sup> | K / Kl          | 0.76                        | 0.16 | 1.05 | [0.71, 1.29]       | 0.3    | .28          | 3                                   |
| PK67S <sup>+</sup>  | K / M           | 0.27                        | 0.14 | 1.03 | [0.66, 1.34]       | 0.2    | .51          | 3                                   |
| PK82S01             | V / S           | -1.46                       | 0.22 | 0.98 | [0.36, 1.64]       | 0.0    | .30          | 1                                   |
| PK82S02             | V / S           | 0.03                        | 0.18 | 1.03 | [0.75, 1.25]       | 0.2    | .30          | 1                                   |
| PK82S03             | V / S           | -0.31                       | 0.19 | 1.11 | [0.68, 1.32]       | 0.7    | .15          | 1                                   |
| PK82S04             | V / S           | -0.47                       | 0.19 | 0.99 | [0.65, 1.35]       | -0.0   | .32          | 1                                   |
| PK82S05             | V / S           | 0.55                        | 0.17 | 0.98 | [0.83, 1.17]       | -0.3   | .37          | 1                                   |
| PK82S06             | V / S           | -0.10                       | 0.99 | 1.07 | [0.72, 1.28]       | 0.6    | .13          | 1                                   |

*Anmerkungen:* E = Erinnern, V = Verstehen / Analysieren, K = Kreieren, M = Motivierung, L = Leistungsbeurteilung, S = Strukturierung von Unterricht, Kl = Klassenführung, U = Umgang mit Heterogenität. Bei den mit <sup>+</sup> markierten Items handelt es sich um Partial-Credit Antwortitems, deren Stufen

unterschiedliche Komplexitätsniveaus abbilden. Das mit # markierte Item entspricht der Beispielaufgabe aus dem elektronischen Supplement 2, das mit \* markierte Item der in Abbildung 1.
