# Supplementary material for: Pädagogisches Wissen von berufstätigen Mathematiklehrkräften
Source: Atypon-hosted journal article supplement (doi:10.1026/0012-1924/a000250), 2020-04-01
Supplement: 0012-1924_a000250_esm8.pdf [file 0012-1924_a000250_esm8.pdf]

*Elektronisches Supplement 8. Anzahl der Aufgaben, Wertungskategorien, Antwortitems und virtuellen (Antwortitem-)Fälle nach Komplexitätsausprägung in der Kurzfassung des Tests für pädagogisches Wissen aus der Studie TEDS-M (Teacher Education and Development Study: Learning to Teach Mathematics)*

|                                                                   | Anzahl    | Teil einer Aufgabe, die mehrere Wissensselemente erfordert |    |
|-------------------------------------------------------------------|-----------|------------------------------------------------------------|----|
|                                                                   |           | nein                                                       | ja |
| <b>Aufgabenstamm</b>                                              |           |                                                            |    |
| geschlossenes Format                                              | <b>5</b>  | -                                                          | -  |
| offenes Format                                                    | <b>10</b> | -                                                          | -  |
| gesamt                                                            | <b>15</b> | -                                                          | -  |
| <b>Wertungskategorien für (Teil-)Antwortitems</b>                 |           |                                                            |    |
| aus geschlossenen Aufgaben                                        | <b>19</b> | 19                                                         | 0  |
| aus offenen Aufgaben                                              | <b>28</b> | 2                                                          | 26 |
| gesamt                                                            | <b>47</b> | 21                                                         | 26 |
| <b>Antwortitems</b>                                               |           |                                                            |    |
| dichotom                                                          | <b>21</b> | 21                                                         | 0  |
| Partial-Credit                                                    | <b>11</b> | 0                                                          | 11 |
| gesamt                                                            | <b>32</b> | 21                                                         | 11 |
| <b>Virtuelle Fälle der Antwortitems je Komplexitätsausprägung</b> |           |                                                            |    |
| niedrige Komplexität                                              | <b>32</b> | 21                                                         | 11 |
| mittlere Komplexität                                              | <b>14</b> | 0                                                          | 14 |
| hohe Komplexität                                                  | <b>11</b> | 0                                                          | 11 |
| gesamt                                                            | <b>57</b> | 21                                                         | 36 |

*Anmerkung:* Die fett hervorgehobenen Zahlen entsprechen den im Text berichteten Summen.
